# Supplementary material for: Layer-number-dependent photoswitchability in 2D MoS2-diarylethene hybrids
Source: Royal Society of Chemistry journal article supplement (doi:10.1039/d4nr03631j), 2024-12-16
Supplement: d4nr03631j1.pdf [file d4nr03631j1.pdf]

Supplementary Information

**Layer-number-dependent Photoswitchability in 2D MoS<sub>2</sub>-Diarylethene Hybrids**

Sewon Park<sup>1</sup>, Jaehoon Ji<sup>1</sup>, Srajan Pillai<sup>2</sup>, Henry Fischer<sup>2</sup>, Jean Rouillon<sup>3</sup>, Carlos Benitez-Martin<sup>4</sup>, Joakim Andréasson<sup>3</sup>, Jeong Ho You<sup>2</sup>, and Jong Hyun Choi<sup>1\*</sup>

<sup>1</sup> School of Mechanical Engineering, Purdue University, West Lafayette, Indiana 47907, United States

<sup>2</sup> Department of Mechanical Engineering, University of St. Thomas, St. Paul, Minnesota 55105, United States

<sup>3</sup> Department of Chemistry and Chemical Engineering, Chalmers University of Technology, SE-412 96 Gothenburg, Sweden

<sup>4</sup> Department of Chemistry and Molecular Biology, University of Gothenburg, SE-413 90 Gothenburg, Sweden

\* Corresponding author: [jchoi@purdue.edu](mailto:jchoi@purdue.edu)

**Contents:**

1. AFM Imaging of MoS<sub>2</sub>-DAE Samples on SiO<sub>2</sub>/Si Substrates
2. PL Measurements of Additional MoS<sub>2</sub>-DAE Hybrid Samples
3. Control Experiments with Monolayer MoS<sub>2</sub>
4. AFM Imaging of MoS<sub>2</sub> Samples on ITO Substrates
5. C-AFM Measurements of Additional MoS<sub>2</sub>-DAE Hybrid Samples
6. DFT Calculations

## 1. AFM Imaging of MoS<sub>2</sub>-DAE Samples on SiO<sub>2</sub>/Si Substrates

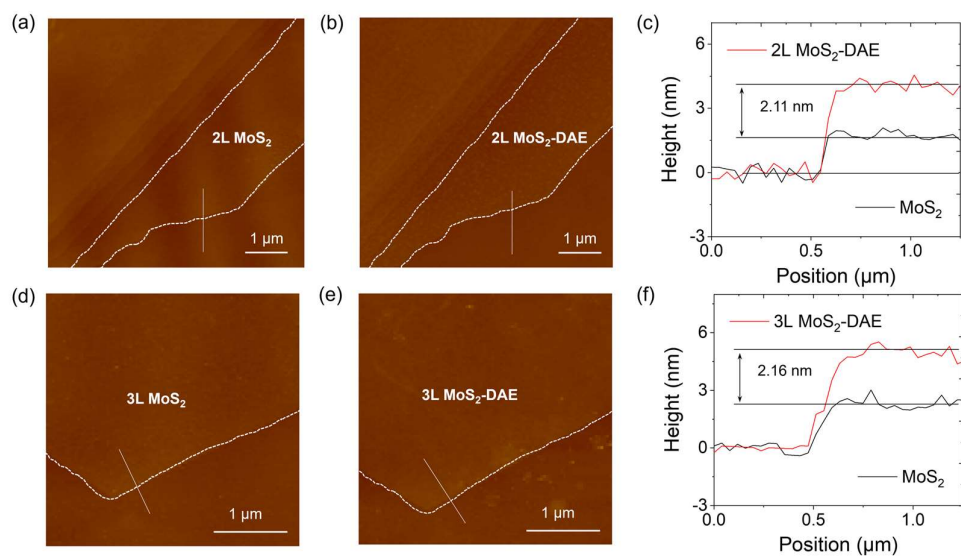

**Figure S1.** AFM images of (a) 2L MoS<sub>2</sub> flake and (b) 2L MoS<sub>2</sub>-DAE hybrid are shown, with the corresponding height differences depicted in (c). The thickness of the 2L MoS<sub>2</sub> flake is ~1.60 nm, while the DAE measures ~2.11 nm. Additionally, AFM images of (d) 3L MoS<sub>2</sub> flake and (e) 3L MoS<sub>2</sub>-DAE hybrid are provided. The thickness of the 3L MoS<sub>2</sub> flake is ~2.28 nm, and the DAE measures ~2.16 nm. These samples were used for PL measurements presented in Figure 2e-f.

## 2. PL Measurements of Additional MoS<sub>2</sub>-DAE Hybrid Samples

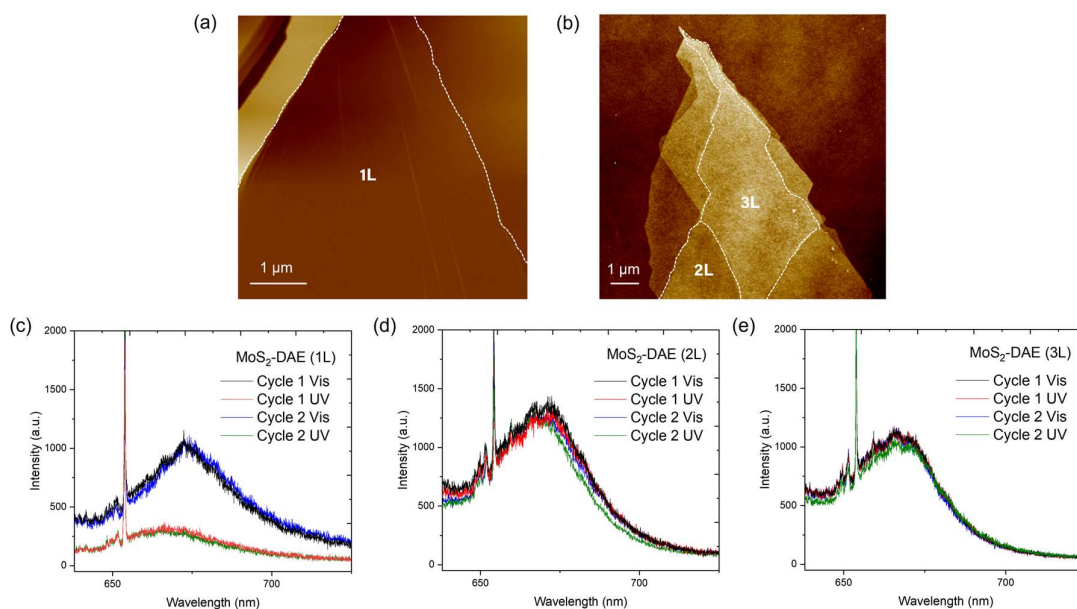

**Figure S2.** AFM image of MoS<sub>2</sub> flakes featuring (a) 1L, (b) 2L, and 3L, with the boundaries highlighted by dotted lines. The photo-modulation processes were repeated twice on the 1L to 3L MoS<sub>2</sub>-DAE system. (c) The 1L MoS<sub>2</sub> exhibits significant PL quenching after UV irradiation, with the signal fully recovering under visible light. In contrast, the hybrids with (d) 2L and (e) 3L MoS<sub>2</sub> show no notable PL quenching.

### 3. Control Experiments with Monolayer MoS<sub>2</sub>

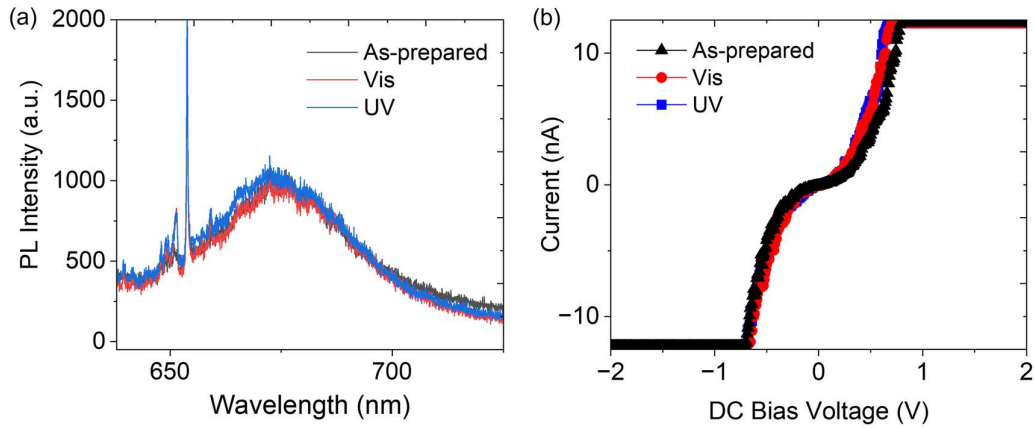

**Figure S3.** Control experiments were conducted with 1L MoS<sub>2</sub> (without a DAE layer) to confirm the effects of visible and UV light irradiation, which also indicates minimal substrate effects on charge transfer interactions. (a) The PL emission of as-prepared monolayer MoS<sub>2</sub> is consistent with those after exposure to visible and UV irradiation, showing no significant differences. (b) The C-AFM results also indicate that the variations between each case are minimal. These results indicate that optical modulation in the 1L MoS<sub>2</sub>-DAE system arises from the unique hybrid interaction between DAE and 1L MoS<sub>2</sub>.

#### 4. AFM Imaging of MoS<sub>2</sub> Samples on ITO Substrates

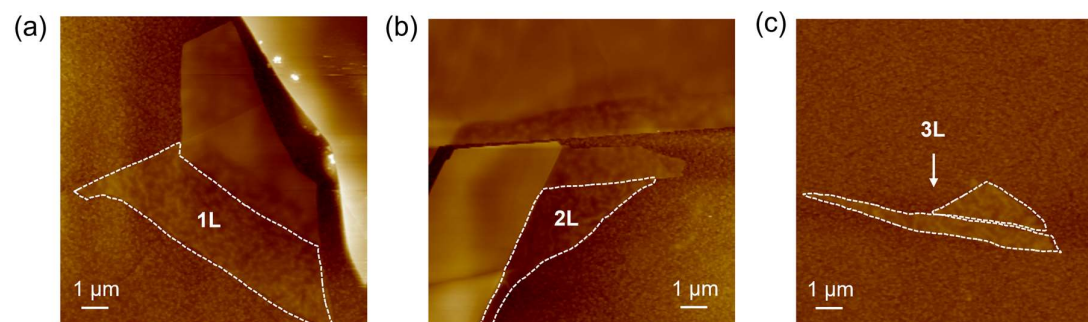

**Figure S4.** AFM images of (a) 1L MoS<sub>2</sub>, (b) 2L MoS<sub>2</sub>, and (c) 3L MoS<sub>2</sub> flakes fabricated on ITO substrates. These samples were used to measure C-AFM data presented in Figure 4.

## 5. C-AFM Measurements of Additional MoS<sub>2</sub>-DAE Hybrid Samples

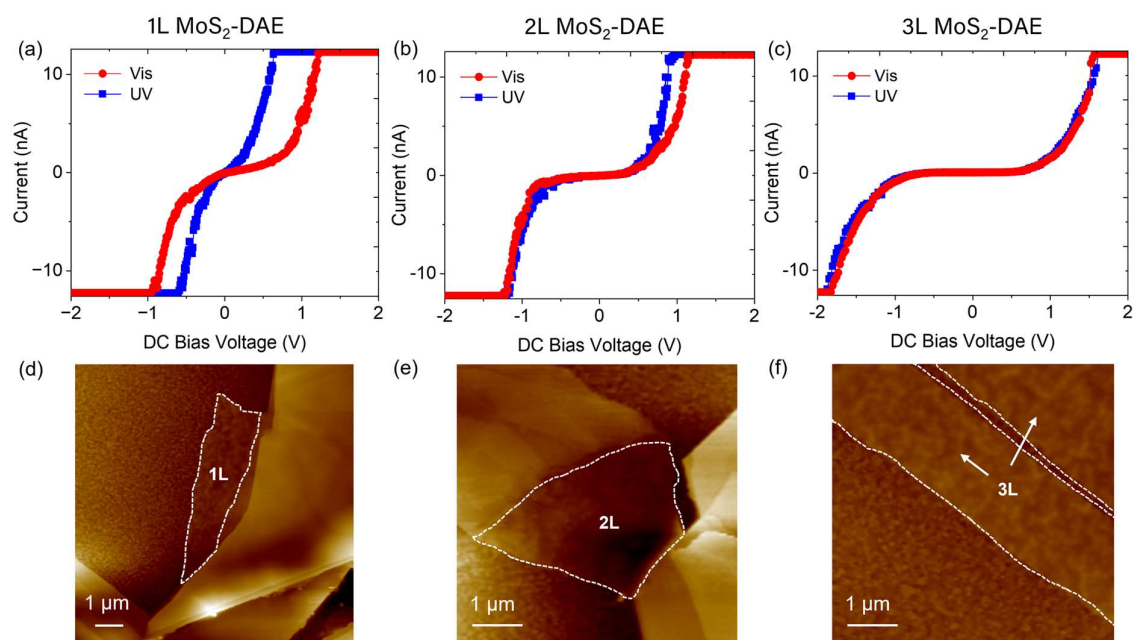

**Figure S5.** Additional C-AFM measurements were conducted on MoS<sub>2</sub>-DAE hybrid samples under both visible and UV light irradiation. These measurements were performed on (a) 1L MoS<sub>2</sub>, as illustrated in the AFM image (d); (b) 2L MoS<sub>2</sub>, as depicted in the AFM image (e); and (c) 3L MoS<sub>2</sub>, as shown in the AFM image (f).

## 6. DFT Calculations

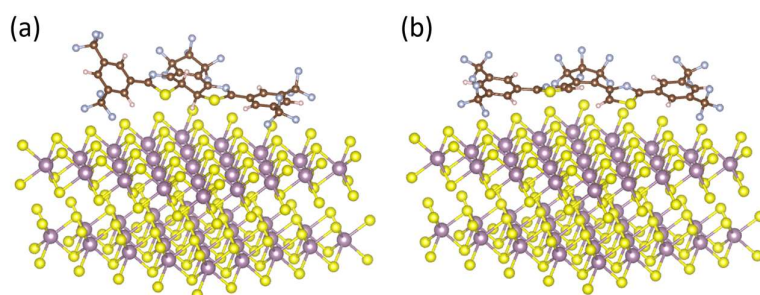

**Figure S6.** Representative relaxed hybrid structures. (a) Closed- and (b) Open-form DAE on 2L MoS<sub>2</sub>-DAE. The DAE conformation and interaction at the hybrid heterointerface are consistent with those between DAE and 1L and 3L MoS<sub>2</sub>.
